# Supplementary figures and images for: The development of the service industry in the modern economy: mechanisms and implications for China
Source: Springer Nature journal article supplement (doi:10.1186/2196-5633-1-3), 2013-12-01

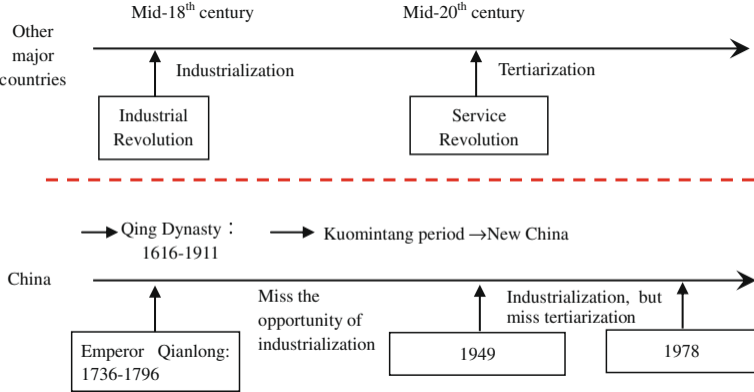

Supplement: 40589_2013_3_MOESM2_ESM.pdf [file 40589_2013_3_MOESM2_ESM.pdf]
